# Supplementary material for: Live cell imaging and proteomic profiling of endogenous NEAT1 lncRNA by CRISPR/Cas9-mediated knock-in
Source: PubMed Central journal article supplement (PMC7452982; doi:10.1007/s13238-020-00706-w), 2020-05-26
Supplement: 13238_2020_706_MOESM1_ESM.pdf [file 13238_2020_706_MOESM1_ESM.pdf]

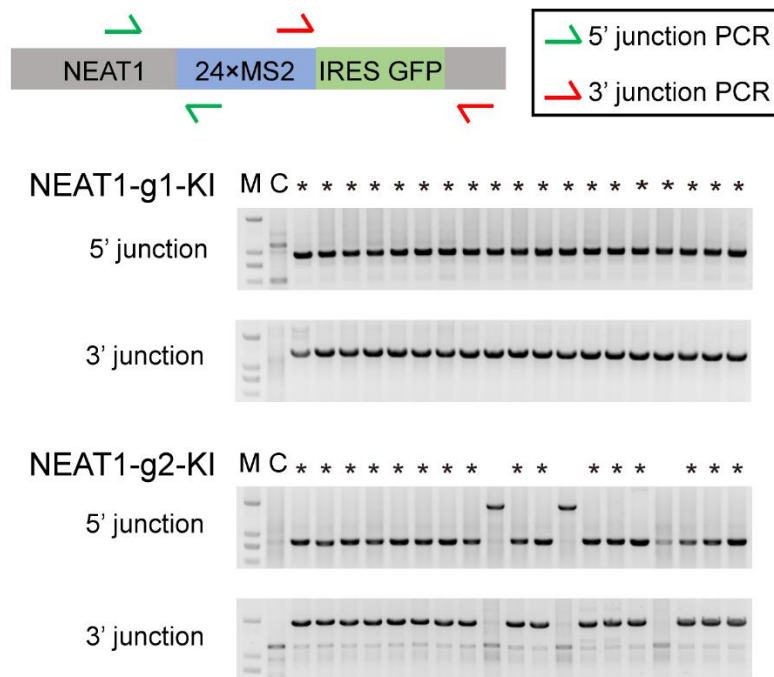

**Supplementary Figure S1. Junction PCR of the single clones from two independent KI cell lines.** Upper panel shows the schematic of the 5' and 3' junction PCR primers used for genotyping. Lower panel shows the junction PCR of the single clones of two KI cell lines. Expected band sizes from the knock-in alleles of line1 are around 0.9 KB for 5' junction PCR and 1.4 KB for 3' junction PCR, while line2 are around 0.6 KB for 5' junction PCR and 1.9 KB for 3' junction PCR. WT HEK293T gDNA was used as a negative control. C indicates WT control, \* indicate single clones with expected band size.

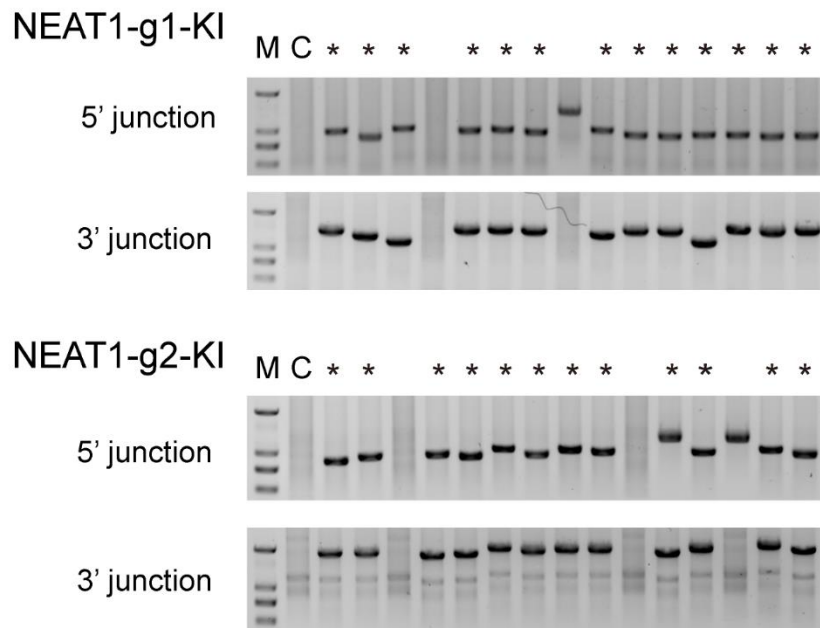

**Supplementary Figure S2. Genotyping PCR of the GFP positive subclones from two NEAT1 KI cell lines after paired gRNAs KO.** 5' and 3' junction PCR were carried out for the GFP positive subclones of two NEAT1 KI cell lines after double KO of IRES-GFP fragment. On-target KI cells without simultaneous cutting of paired gRNAs would still retain the expected band sizes of PCR products and GFP expression, while off-target insertions could not generate the expected junction PCR products. WT HEK293T gDNA was used as a negative control. C indicates WT control, \* indicate single clones with expected band size.

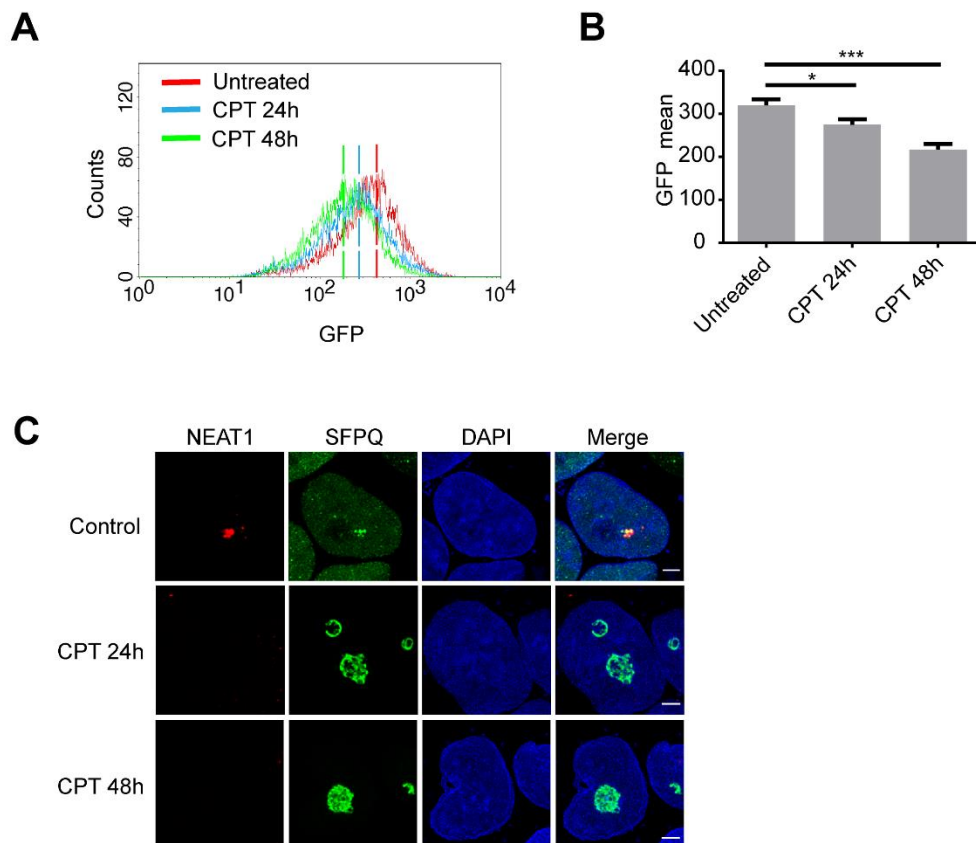

**Supplementary Figure S3. GFP intensity of CERTIS labeled NEAT1 correctly mirror the regulatory relationship by CPT in live cells**

- (A) GFP peak shifted to the left gradually after 5  $\mu$ M CPT treatment for 24 and 48 h, respectively. Untreated cells were used as control. GFP fluorescence intensity was detected by flow cytometer and the dotted lines indicated the mean of GFP fluorescence intensity.
- (B) Mean fluorescence intensity (from A) showed time-dependent decrease of NEAT1 level after CPT treatment for 24 and 48 h.
- (C) NEAT1 (red) disaggregated and SFPQ relocated to the nucleolus after CPT treatment. Scale bar: 2  $\mu$ m.

## ActD 6h

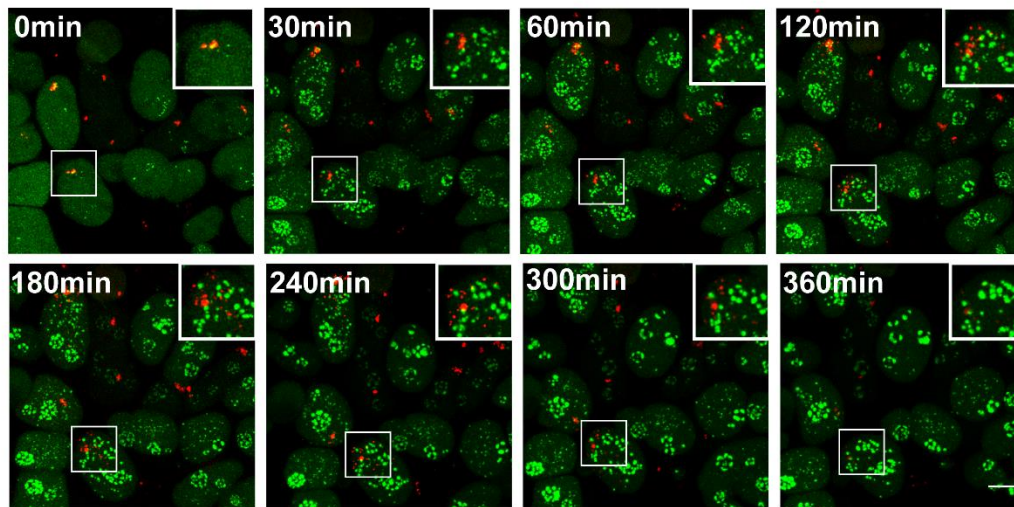

**Supplementary Figure S4. CERTIS enables long-term time-lapse imaging of endogenous NEAT1 in living cells.** Snapshots displayed the dynamic of NEAT1 and SFPQ after 250 ng/ml ActD treatment for 6 h, with a 15 min time-lapse. Insets showed the magnified boxed region of the merged channel of NEAT1 and SFPQ. Scale bar: 2  $\mu\text{m}$ .

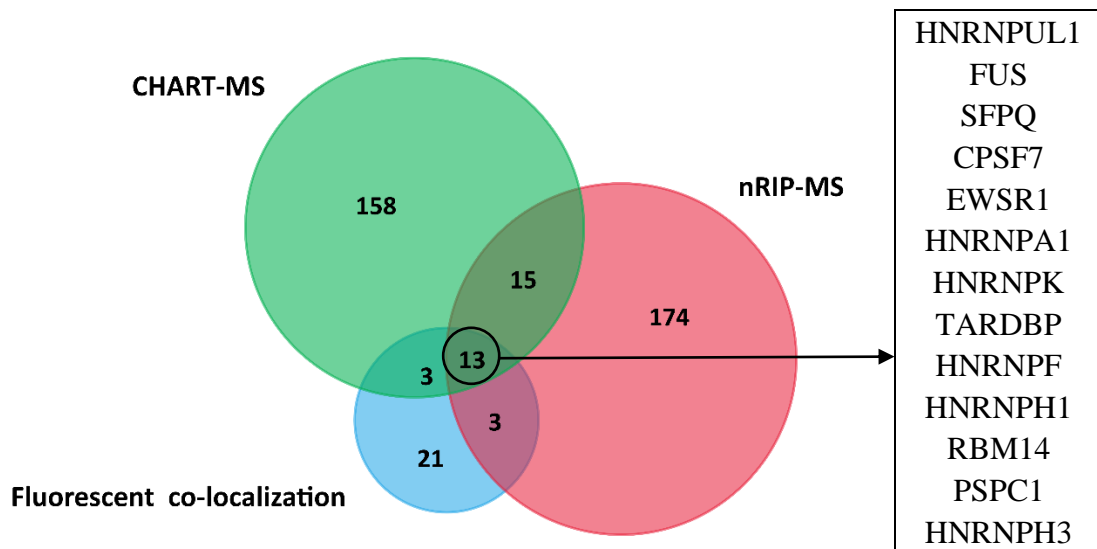

| Dataset                                             | Total number of gene symbols |
|-----------------------------------------------------|------------------------------|
| nRIP-MS                                             | 205                          |
| Fluorescent co-localization (Naganuma et al., 2012) | 189                          |
| CHRAT-MS (West et al., 2014)                        | 40                           |

**Supplementary Figure S5. Comparison of NEAT1 nRIP-MS with previously published screening of paraspeckle proteins.** Venn diagram comparing numbers of nRIP-MS identified paraspeckle proteins with previously published CHART-MS and Fluorescent co-localization screening methods. The overlapping proteins identified among all three methods were listed in the right inset.

### >Universal KI template vector

ctaaattgtaagcgtaaatattttgttaaaattcgcgtaaatattttgttaaatcagctcatttttaaccaataggccgaaatcggcaa  
aatccctataaatcaaaagaatagaccgagataggggtgagtggttccagtttgaacaagagtcactattaaagaacgtg  
gactccaacgtcaaagggcgaaaaaccgtctatcagggcgatggcccactacgtgaaccatcacctaatacaagtttttggg  
tcgaggtgccgtaaagcactaaatcggaaccctaaagggagccccgatttagagcttgacggggaaagccggcgaacgtg  
gcgagaaaggaaggggaagaaagcgaaggagcgggcgctagggcgctggcaagttagcggtcacgctgcgcgtaacc  
accacaccgcccgcgctaatacgccgctacagggcgctcccattcgccattcaggctgcgcaactgttgggaagggcgatc  
ggtagggcctcttgcctattacgccagctggcgaaagggggatgtgctgcaaggcgattaagttgggtaaccaggggttt  
cccagtcacgacggtgtaaacgacggccagtgagcgcgtaatacgactcactatagggcgaattgggtaccgggcccc  
cctcgaggtcgacggtatcgataagcttagctgtaggacgtgcaccaggactcggctcacacatgcggtatcctaaggtaccta  
attgctagaaaacatgaggatcacccatgtctgcaggtcgactctagaaaacatgaggatcacccatgtctgcagtattccgg  
gttcattagatcctaaggtacctaattgcctagaaaacatgaggatcacccatgtctgcaggtcgactctagaaaacatgaggat  
cacccatgtctgcagtattccgggttcattagatcctaaggtacctaattgcctagaaaacatgaggatcacccatgtctgcagg  
tcgactccagaaaacatgaggatcacccatgtctgcagtattccgggttcattagatcctaaggtacctaattgcctagaaaaca  
tgaggatcacccatgtctgcaggtcgactctagaaaacatgaggatcacccatgtctgcagtattccgggttcattagatcctaa  
ggtagcctaattgcctagaaaacatgaggatcacccatgtctgcaggtcgactctagaaaacatgaggatcacccatgtctgcagt  
attccgggttcattagatcctaaggtacctaattgcctagaaaacatgaggatcacccatgtctgcaggtcgactccagaaaac  
atgaggatcacccatgtctgcagtattccgggttcattagatcctaaggtacctaattgcctagaaaacatgaggatcacccatg  
tctgcaggtcgactctagaaaacatgaggatcacccatgtctgcagtattccgggttcattagatcctaaggtacctaattgccta  
gaaaacatgaggatcacccatgtctgcaggtcgactctagaaaacatgaggatcacccatgtctgcagtattccgggttcatta  
gatcctaaggtacctaattgcctagaaaacatgaggatcacccatgtctgcaggtcgactccagaaaacatgaggatcacccat  
gtctgcagtattccgggttcattagatcctaaggtacctaattgcctagaaaacatgaggatcacccatgtctgcaggtcgactct  
agaaaacatgaggatcacccatgtctgcagtattccgggttcattagatcctaaggtacctaattgcctagaaaacatgaggat  
cacccatgtctgcaggtcgactctagaaaacatgaggatcacccatgtctgcagtattccgggttcattagatcctaaggtacct  
aattgcctagaaaacatgaggatcacccatgtctgcaggtcgactccagaaaacatgaggatcacccatgtctgcagtattccgg  
ggttcattagatctgcgcgcatcgaatcaacctctggattacaaaagcatcgtagcgtacgtgtttggcccccc  
ccctaacgttactggccgaagccgcttgaataagggccggtgctgtttgtctatatgttatttccaccatattgccgtcttttggc  
aatgtgagggcccgaaacctggccctgtcttctgacgagcattcctaggggtcttccctctcgccaaaggaatgcaaggct  
tgtgaatgtcgtgaaggaagcagttcctctggaagcttctgaagacaaacaacgtctgtagcgaccttgcagggcagcgga  
acccccacctggcgacaggtgcctctgcggccaaaagccacgtgtataagatacacctgcaaaggcgcacaccccagtg  
ccacgttgtagttggatagttgtggaagagtcacatggctctcctcaagcgtattcaacaaggggctgaaggatgccaga  
aggtacccattgtatggatctgatctgggcctcggcgcacatgctttacatgtgttagtcgaggttaaaaaacgtctagggc  
ccccgaaccacggggacgtggtttctttgaaaaacacgatgataatggccacaacctggtgagcaagggcgaggag  
ctgttacccgggtgtgcccacctcgtgagctggacggcgacgtaaacggccacaagttcagcgtgtccggcgagggc  
gagggcgatgccacctacggcaagctgacctgaagttcatctgcaccaccggcaagctgcccgtgccctggccaccctcgt  
gaccacctgacctacggcgtgagtgctcagccgctacccgaccacatgaagcagcagcacttctcaagtcgcatgcc  
cgaaggctacgtccaggagcgcaccatcttctcaaggacgacggcaactacaagaccgcccggaggtgaagttcgaggg  
cgacaccctgtgaaccgcatcgagctgaaggcagcactcaaggaggacggcaacatcctggggcacaagctggagta  
caactacaacagccacaacgtctatatcatggccgacaagcagaagaacggcatcaaggtgaactcaagatccgccacaaca  
tcgaggacggcagcgtgcagctcggcaccactaccagcagaacacccccatcggcgacggccccgtgctgctgcccgaca  
accactacctgagcaccagtcggccctgagcaaaagacccaacgagaagcgcgatcacatggtcctgctggagttcgtgacc  
gccggggatcactctcggcatggacgagctgtacaagtaacccaaacctacctcgcagccccggggatccactagttcta  
gagcggccgcccgggtggagctccagctttgttcccttagtgaggggtaattgcgcgcttggcgtaacatggtcatagc  
gtttcctgtgtgaaattgttatccgctcacaattccacacaacatacagagccggaagcataaagtgaagcctgggggtgcctaa

tgagtgagctaactcacattaattgCGTTGCGTCACTGCCGCTTCCAGTCGGGAAACCTGTCGTGCCAGCTGCATTAATGAATC  
GGCCAACGCGCGGGGAGAGGCGGTTGCGTATTGGGCGCTTCCGCTTCTCGTCACTGACTCGTGCCTCGGTCGTTCCG  
CTGCGGCGAGCGGTATCAGTCACTCAAAGCGGTAATACGGTTATCCACAGAATCAGGGGATAACGCAGGAAAGAACATGT  
GAGCAAAAGGCCAGCAAAGGCCAGGAACCGTAAAAGGCCGCGTTGCTGGCGTTTTCCATAGGCTCGCCCCCTGACGA  
GCATCACAAAATCGACGCTCAAGTCAGAGGTGGCGAAACCCGACAGGACTATAAAGATAACCAGGCGTTCCCTGGAAGC  
TCCCTCGTGCCTCTCTGTTCCGACCCGCTCCGCTTACC GGATACCTGTCGCTTCTCCCTCGGGAAGCGTGGCGCTTCTCATA  
GCTCAGCTGTAGGTATCTCAGTTCGGTGTAGGTCGTTCCGCTCCAAGCTGGGCTGTGTGCACGAACCCCCGTTAGCCGACCG  
CTGCGCTTATCCGGTAACATCGTCTTGAGTCCAACCCGGTAAGACACGACTTATCGCCACTGGCAGCAGCCACTGGTAACAGG  
ATTAGCAGAGCGAGGTATGTAGGCGGTGTACAGAGTCTTGAAGTGGTGGCCTAACTACGGCTACTAGAAGGACAGTATTT  
GGTATCTGCGTCTGCTGAAGCCAGTTACCTCGAAAAAGAGTTGGTAGCTCTTGATCCGGCAAACAACCACCGCTGGTAGC  
GGTGGTTTTTTGTTGCAAGCAGCAGATTACGCGCAGAAAAAAGGATCTCAAGAAGATCCTTGATCTTTTACGGGGTCTGAC  
GCTCAGTGGAAACGAAAACACGTTAAGGGATTTGGTGCATGAGATTACAAAAGGATCTCACCTAGATCCTTTAAATAAAA  
TGAAGTTTAAATCAATCTAAAGTATATAGAGTAAACTGGTCTGACAGTTACCAATGCTTAATCAGTGAGGCACCTATCTCAGCG  
ATCTGTCTATTTGTTTCATCCATAGTTGCTGACTCCCCGTCGTGTAGATAACTACGATACGGGAGGGCTTACCATCTGGCCCCAGT  
GCTGCAATGATACCGCGAGACCCACGCTACCCGGCTCCAGATTTATCAGCAATAACCAGCCAGCCGGAAGGGCCGAGCGCA  
GAAGTGGTCTGCAACTTTATCCGCTCCATCCAGTCTAATGTTGCGGGAAGCTAGAGTAAGTAGTTCGCCAGTTAATAGTTT  
GCGCAACGTTGTTGCCATTGCTACAGGCATCGTGGTGTACGCTCGTCTGTTGGTATGGCTTATTAGTCCGGTTCCCAACGATC  
AAGGCGAGTTACATGATCCCCATGTTGTGAAAAAGCGGTTAGTCTCTCGTCTCCGATCGTTGTGAGAAGTAAGTTGGCC  
GCAGTGTATCACTCATGGTTATGGCAGCACTGCATAATTCTTACTGTATGCCATCCGTAAGATGCTTTTCTGTACTGGTGAGTA  
CTCAACCAAGTCATTCTGAGAATAGTGTATGCGGCGACCGAGTTGCTCTGCCCCGGCTCAATACGGGATAATACCGCGCCACAT  
AGCAGAACTTAAAGTGCTCATATTGAAAACGTTCTTGGGGCGAAAACCTCAAGGATCTTACCCTGTTGAGATCCAGTTC  
GATGTAACCCACTCGTGCACCCAAGTATCTTCAAGCATCTTTACTTCCAGCGTTTCTGGGTGAGCAAAAACAGGAAGGCAAA  
ATGCCGCAAAAAGGGAATAAGGGCGACCGGAATGTTGAATACTCATACTTCTCTTTTCAATATTATTGAAGCATTATCAGG  
GTTATTGTCTCATGAGCGGATACATATTTGAATGTATTGAAAAATAACAAATAGGGGTTCCGCGCACATTTCCCGAAAAGTG  
CCAC

**Supplementary Figure 6. Full plasmid sequences of the Universal KI template vector.** Purple, orange, blue, green and red letters indicate the sequences of 24×MS2, pre-gRNA, IRES, GFP and the CC-rich region, respectively.

>NEAT1-g1-KI

cacatctggatcagttcctccccattttgttggtcaaatccgatctgccatatcctgtgtaatgacaagtgagttgattctacc  
gtcactcctggggtctctccgcttcccctgagctggctcagcagctctgctccatgtgtttgatgcagggtgaccttggtatt  
cccgacactaacgccccgtctgtggactgcttctgcttgggcttctactgtgtctggtgttgacagtgacagctaaagggtg  
tgcacacatgtgcacacacactccgctgtcttcttgttgcactggactaaatatctatgagggttattttcaactgctgaattg  
gaatgattttatcttttctgcttctgcccattgtacatgtgtttatttactgtttgtattggtagttactatgtggggacacaat  
tacttgggctgaaataatccactgtgtggttgggctcctctggggcattccagggtgagaggttgcactgccactgggc  
catgtgggcccggcaccagcattttgtggttacgaattctacagtcacaaatatctttgggcaaatccccctctatacctcaagg  
cagcttttggttgcaacccactgcccagagggaaggccagtcacttggctctcactgccctgcgccccagatgggtc  
tagggctgctgttttccctggccctgccaacaccactgttttacttctgctcattggctgagtgagtggttctctggaagcca  
gtggcacggttccccgcgtagctcgttatcccacagcacacaccaagggttctgttctaacacgctgaattaattctttgc  
tcatttacagagtgtgtttgactgccccatttctgaggccttgaaggccagagctttgttctcatcggcaggttgggac  
ttagatggcctggaatgttctctctgctgctgcagtaagtaagtccccgcaccatagtggttagctgtaggacgtgcaccc  
aggactcggctcacacatgcccagcctaaaggctacctaattgcttagaaaacatgaggatcacccatgtctgcaggtcact  
ctagaaaacatgaggatcacccatgtctgcagtttccgggttcattagatcctaaggctacctaattgcttagaaaacatga  
ggatcacccatgtctgcaggtcactctagaaaacatgaggatcacccatgtctgcagtttccgggttcattagatcctaa  
ggatcctaattgcttagaaaacatgaggatcacccatgtctgcaggtcactccagaaaacatgaggatcacccatgtctgc  
agtattccccgggttcattagatcctaaggctacctaattgcttagaaaacatgaggatcacccatgtctgcaggtcactctag  
aaaacatgaggatcacccatgtctgcagtttccgggttcattagatcctaaggctacctaattgcttagaaaacatgaggat  
cacccatgtctgcaggtcactctagaaaacatgaggatcacccatgtctgcagtttccgggttcattagatcctaaggta  
cctaattgcttagaaaacatgaggatcacccatgtctgcaggtcactccagaaaacatgaggatcacccatgtctgcagta  
ttccccgggttcattagatcctaaggctacctaattgcttagaaaacatgaggatcacccatgtctgcaggtcactctagaaa  
catgaggatcacccatgtctgcagtttccgggttcattagatcctaaggctacctaattgcttagaaaacatgaggatcac  
catgtctgcaggtcactctagaaaacatgaggatcacccatgtctgcagtttccgggttcattagatcctaaggctaccta  
attgcttagaaaacatgaggatcacccatgtctgcaggtcactccagaaaacatgaggatcacccatgtctgcagtttcc  
cgggttcattagatcctaaggctacctaattgcttagaaaacatgaggatcacccatgtctgcaggtcactctagaaaacatg  
aggatcacccatgtctgcagtttccgggttcattagatcctaaggctacctaattgcttagaaaacatgaggatcacccatg  
ctgcaggtcactctagaaaacatgaggatcacccatgtctgcagtttccgggttcattagatcctaaggctacctaattg  
ctagaaaacatgaggatcacccatgtctgcaggtcactccagaaaacatgaggatcacccatgtctgcagtttccggg  
ttcattagatctgcgcgatcgaatcctaatacctctggattacaaaagcatcgtacgcgtgtttggcccccc  
ccctaacgttactggccgaagccgcttgaataaggccggtgtgcttctctatatgtattttccaccatattgccgtctttg  
gcaatgtgagggccccgaaacctggccctgtctctgacgagcattctaggggttcttcccctctcgccaaaggaatgca  
aggctgttgaatgtcgtgaaggaagcagttccttggaaagcttctgaagacaaaacgctctgtagcgacctttgcagg  
cagcggaaacccccacctggcgacaggtcctctcgccgcaaaaagccacgtgataagatacctgcaagggcga  
caacccagtgccacggtgtgagttgatagttgtgaaagagcacaatggctctcctcaagcgattcaacaaggggctga  
aggatgccagaaggatccccattgtatgggatctgactggggcctcgggtgcacatgctttacatgtgtttagtcgaggtta  
aaaaaacgtctaggccccgaaccacggggacgtggtttctttgaaaaacacgatgataatggccacaacctggt  
gagcaagggcgaggagctgttaccggggtggtgccatcctggtcagctggacggcgacgtaaacggccacaaggt  
cagcgtgtccggcgagggcgagggcgatgccacctacggcaagctgacctgaagttcatctgaccaccggcaagct  
gcccgtgccctggcccacctctgaccacctgacctacggcgtgacgtgcttcagccgtaccccaccacatgaagc  
agcacgacttctcaagtccgccatccccgaaggctacgtccaggagcgaccatcttctcaaggacgacggcaactac  
aagaccgcgccgaggtgaagttcgagggcgacacctggtgaaccgcatcagctgaagggcacgacttcaaggag  
gacggcaacatcctggggcacaagctggagtacaactacaacagccacaacgtctatatcatggccgacaagcagaaga  
acggcatcaaggtgaactcaagatccgccacaacatcaggacggcagcgtgcagctcggcaccactaccagcaga







cacaacatcgaggacggcagcgtgcagctcgcgaccactaccagcagaacacccccatcggcgacggccccgtgct  
gctgcccgacaaccactacctgagcaccagtcgcacctgagcaaagacccaacgagaagcgcgatcacatggtcctg  
ctggagttcgtgaccgccgcccggatcactctcggcatggacgagctgtacaagtaacccaacctaccctgagtttccta  
gactcactctggaaatttctgtatacacacagaagcttgctcctctgctcgtgaaggcagagggaggagagctgaagggc  
cagcaccttctcacctgtgggccccctcagtgctcgggtcccagagcatgcaggactgtgcctcgtgttcagtttgctggtctg  
acttcatgctccttgggcaggatatgcatgtccatgctaggagacatgtggatgtgaagctgggggacaatgtcccctggc  
tatgcctttacaagggagtaaggaaggtaggaggtgagcctgggagggaggaggaggcgcggagccgccgag  
gtgttcttttactgagtgagcccatggccgcactcagggttttctttcaccttccatctgtgaaagagtgagcaggaaaa  
gcaaaa

**Supplementary Figure 8. Genomic sequence of the NEAT1 locus after KI by gRNA-2.** Black, purple, orange, blue, green and red letters indicate the sequences of NEAT1 (partial), 24×MS2, pre-gRNA, IRES, GFP and the CC-rich region, respectively. The yellow highlights indicate the MHAs of the MMEJ-repair. The underline shows the newly fusion gRNA (black) and the corresponding PAM motif (red).
